# Supplementary material for: Cocktail Effect of Endocrine Disrupting Chemicals: Application to Chlorpyrifos in Lavender Essential Oils
Source: MDPI journal article supplement (doi:10.3390/ijerph191912984), 2022-10-10
Supplement: s1 [file s1]

# Cocktail effect of endocrine disrupting-chemicals: application to chlorpyrifos in lavender essential oils

Sophie Fouyet <sup>1,2,\*</sup>, Elodie Olivier <sup>1</sup>, Pascale Leproux <sup>1</sup>, Sabrina Boutefnouchet<sup>1</sup>, Mélody Dutot <sup>1,3</sup> and Patrice Rat <sup>1</sup>

<sup>1</sup> Université de Paris, CNRS CiTCoM, 75006 Paris, France;

<sup>2</sup> Laboratoires Léa Nature, 17180 Périgny, France

<sup>3</sup> Yslab, Recherche & Développement, 29000 Quimper, France

\* Correspondence: [sophie.fouyet@etu.u-paris.fr](mailto:sophie.fouyet@etu.u-paris.fr)

## Supplementary data

### 1. EOs composition analysis

#### 1.1. General

GC-MS analysis were performed using GCMS-QP2010 Ultra (Shimadzu Co. Kyoto, Japan) equipped with an Agilent 5973N MS detector. GC-FID analysis was performed using GC-FID Agilent Technologies 7820A equipped with a Parker-Balston hydrogen generator. Analysis was developed using DB-5 (60m x 0.25mm x 0.25µm) and DB-WAX (60m x 0.25mm x 0.25µm) columns for GC-MS analysis and DB-WAX (60m x 0.25mm x 0.25µm) for GC-FID analysis.

1% solutions of Lavender 1 and Lavender 2 EOs in ethyl acetate were prepared and injected for analysis. The following analytical conditions were used for both apparatus and columns: oven temperature was programmed at 50°C, hold for 5 min, then increased to 240°C at a rate of 3°C/min, injector temperature was set at 240°C; carrier gas was helium with a flow rate of 1mL/min; splitting ratio of 1:50 was applied; injection volume was set to 1µL.

For GC-MS mass spectrometry interface, the MS source temperature was set at 220°C with an ionization energy of 70eV and interface temperature of 240°C. Full scan was recorded (50-700m/z).

Identification of constituents was achieved by comparing GC-MS mass spectra with the Mass Spectra Library (NIST 98) components and by comparison of retention indices (RI) calculated from injection of C8-C20 hydrocarbons alkanes mixture with retention indices from the literature on DB-5 column using the following formula:  $RI = (100 * n) + 200 * ((RT_i - RT_{n-1}) / (RT_n - RT_{n-1}))$

Where retention indices RI are calculated using retention time of each compound (RT<sub>i</sub>), and retention time of alkanes from C8 to C20, preceding (RT<sub>n-1</sub>) and following (RT<sub>n</sub>) the considered peak.

Some selected pure standards were also used to confirm the identification of main compounds.

% of main constituents were calculated on chromatograms obtained by GC-FID analysis on the DB-WAX column (60 m x 0.25 mm x 0.25 µm).

---

## 1.2. GC-MS Chromatograms

### 1.2.1. GC-MS Chromatograms – DB-5 column

#### 1.2.1.1. Lavender 1

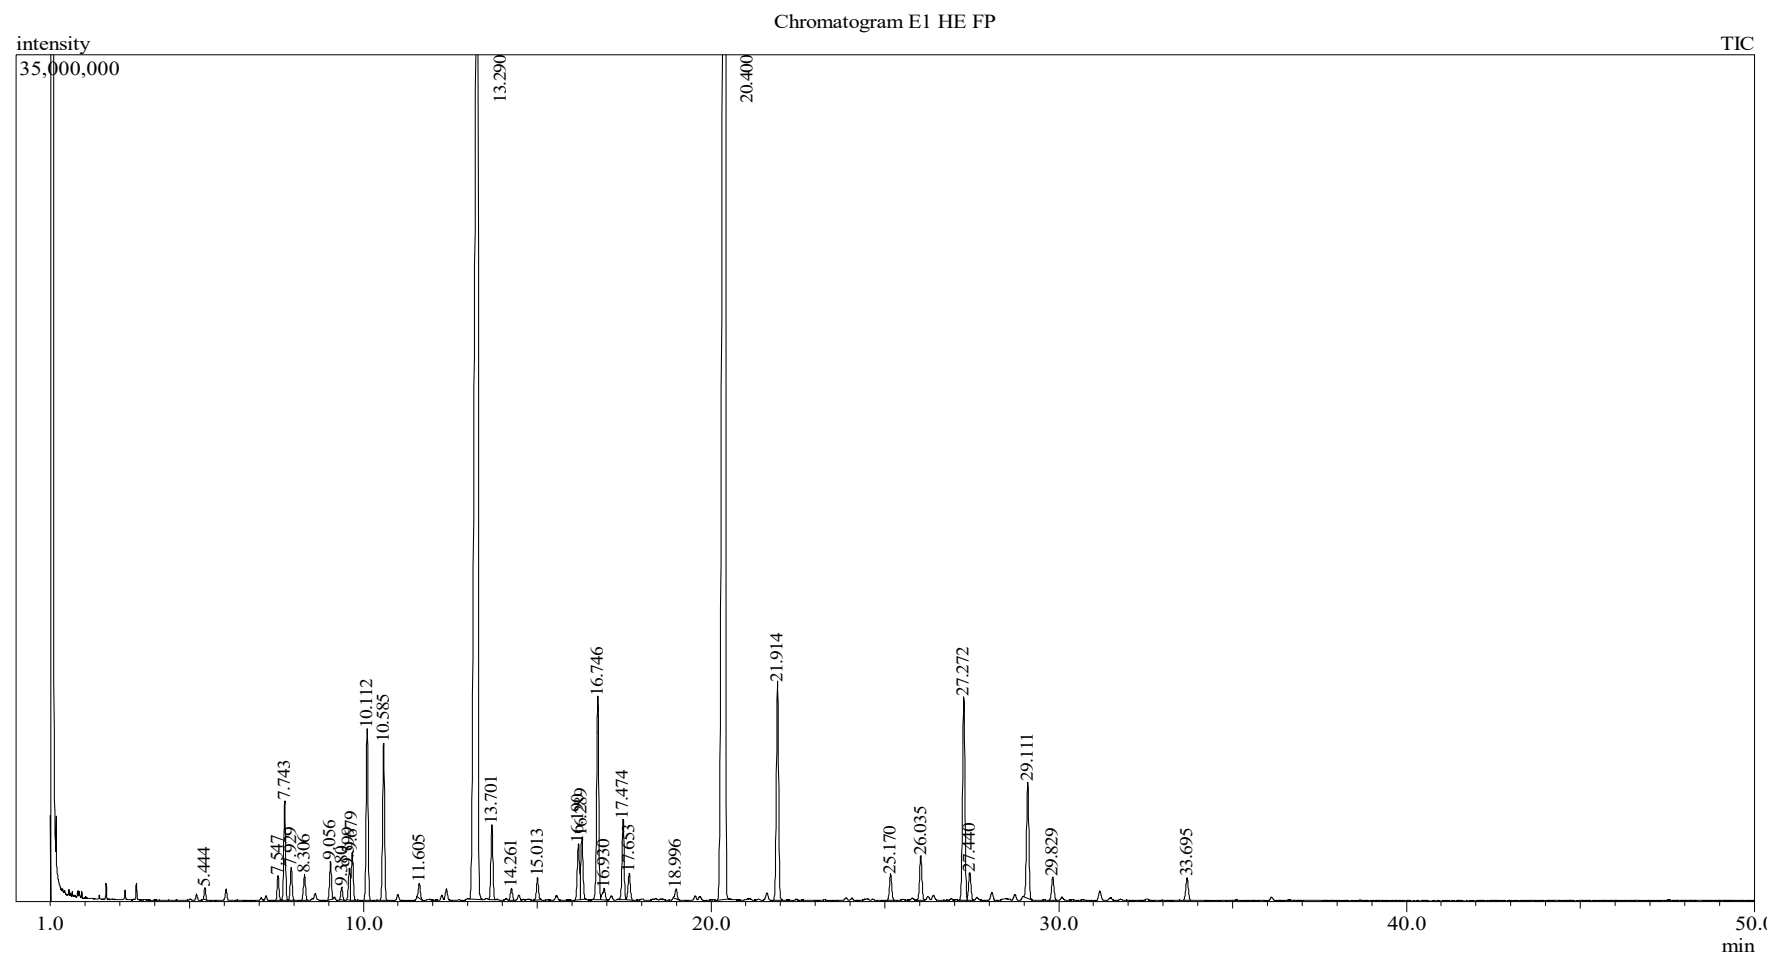

1.2.1.2. *Lavender 2*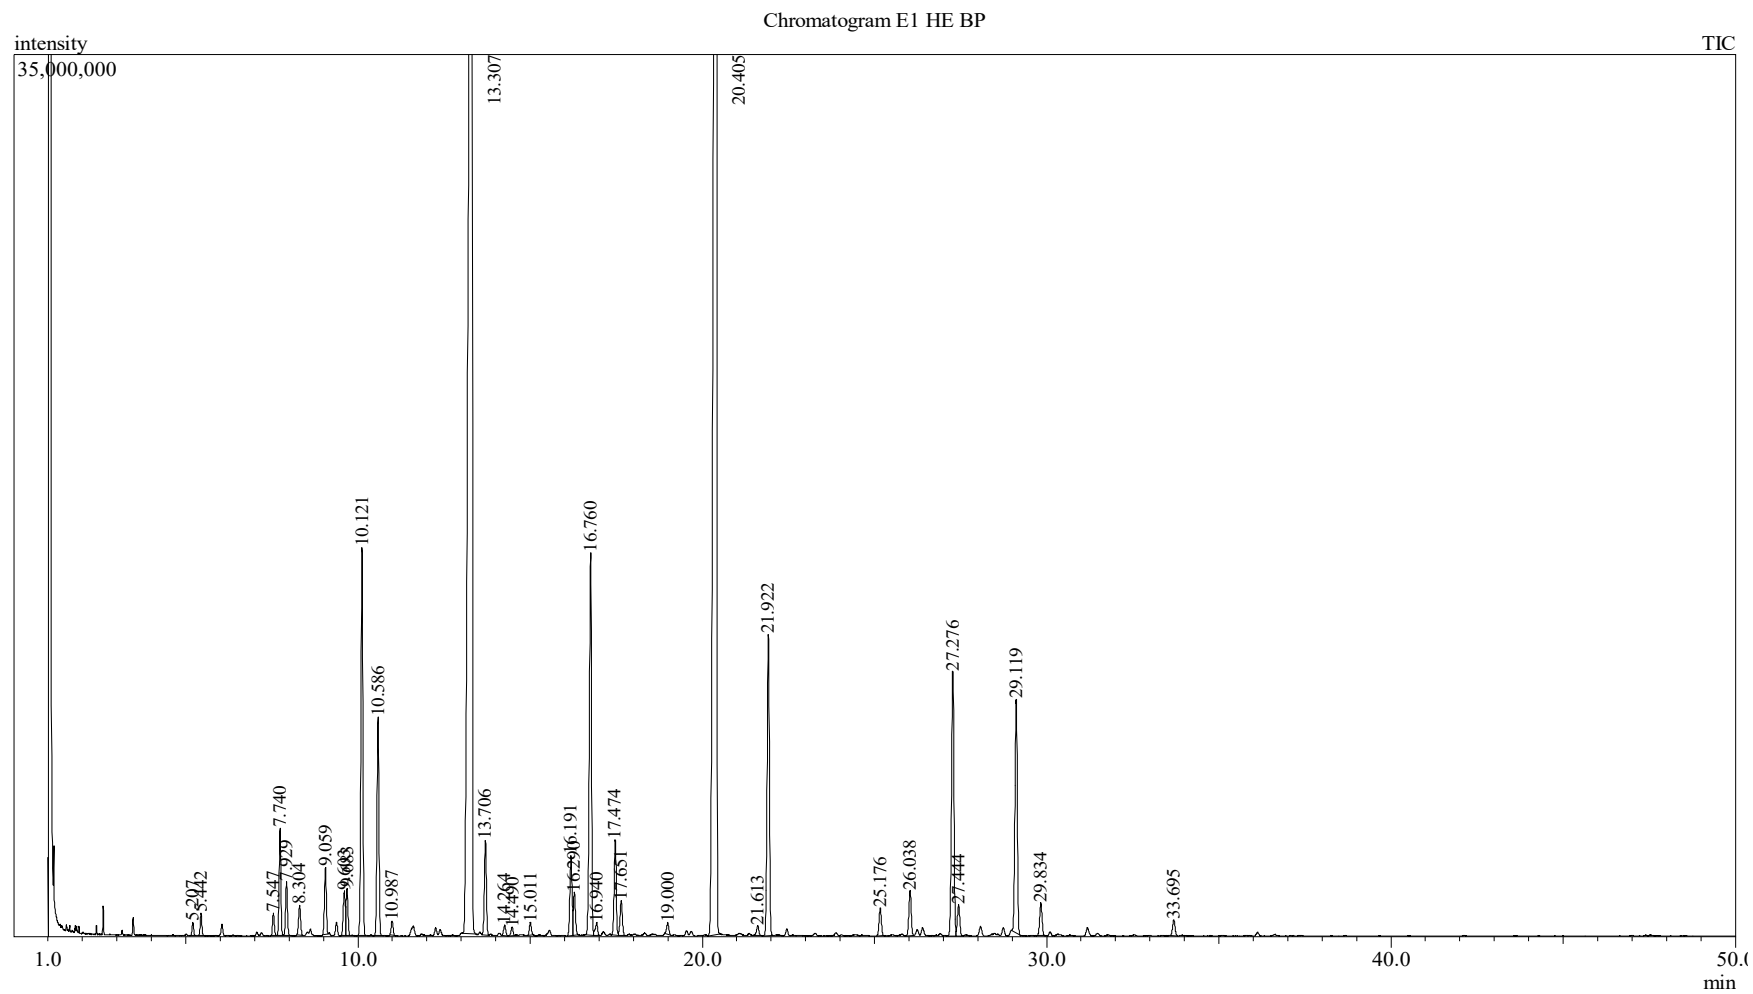

## 1.2.2. GC-MS Chromatograms – DB-Wax column

1.2.2.1. *Lavender 1*

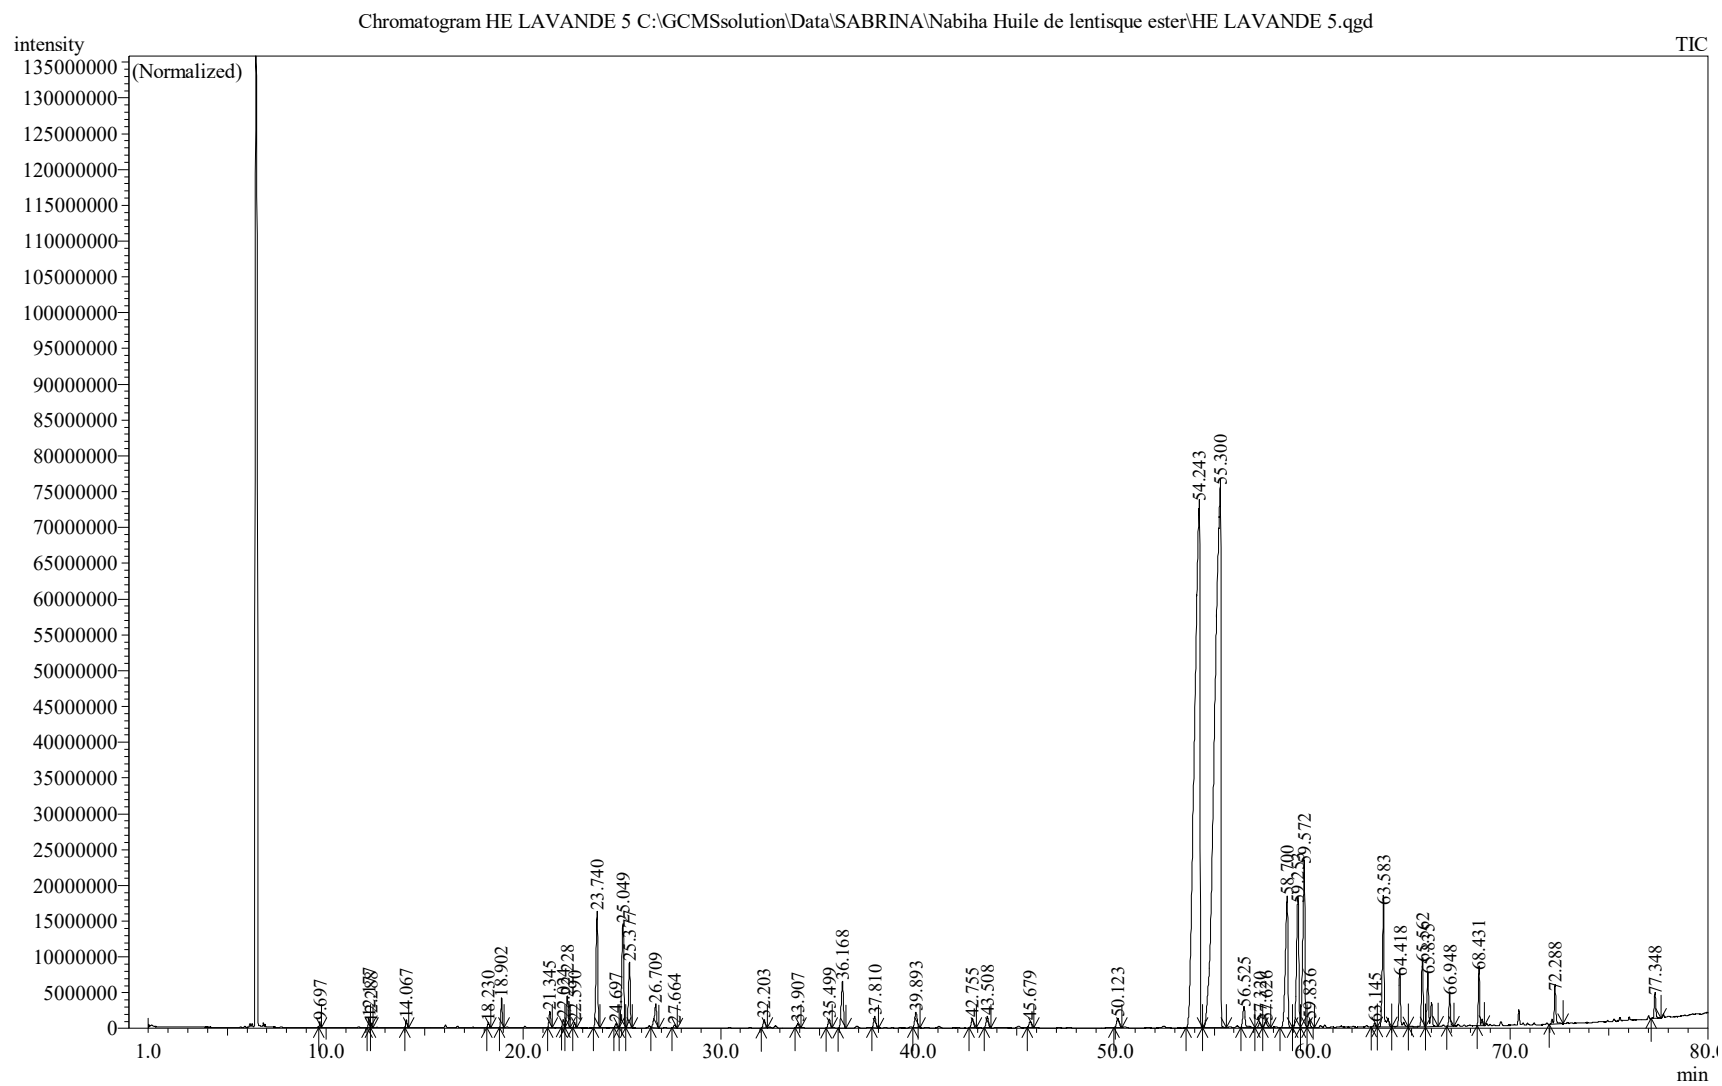

1.2.2.2. Lavender 2

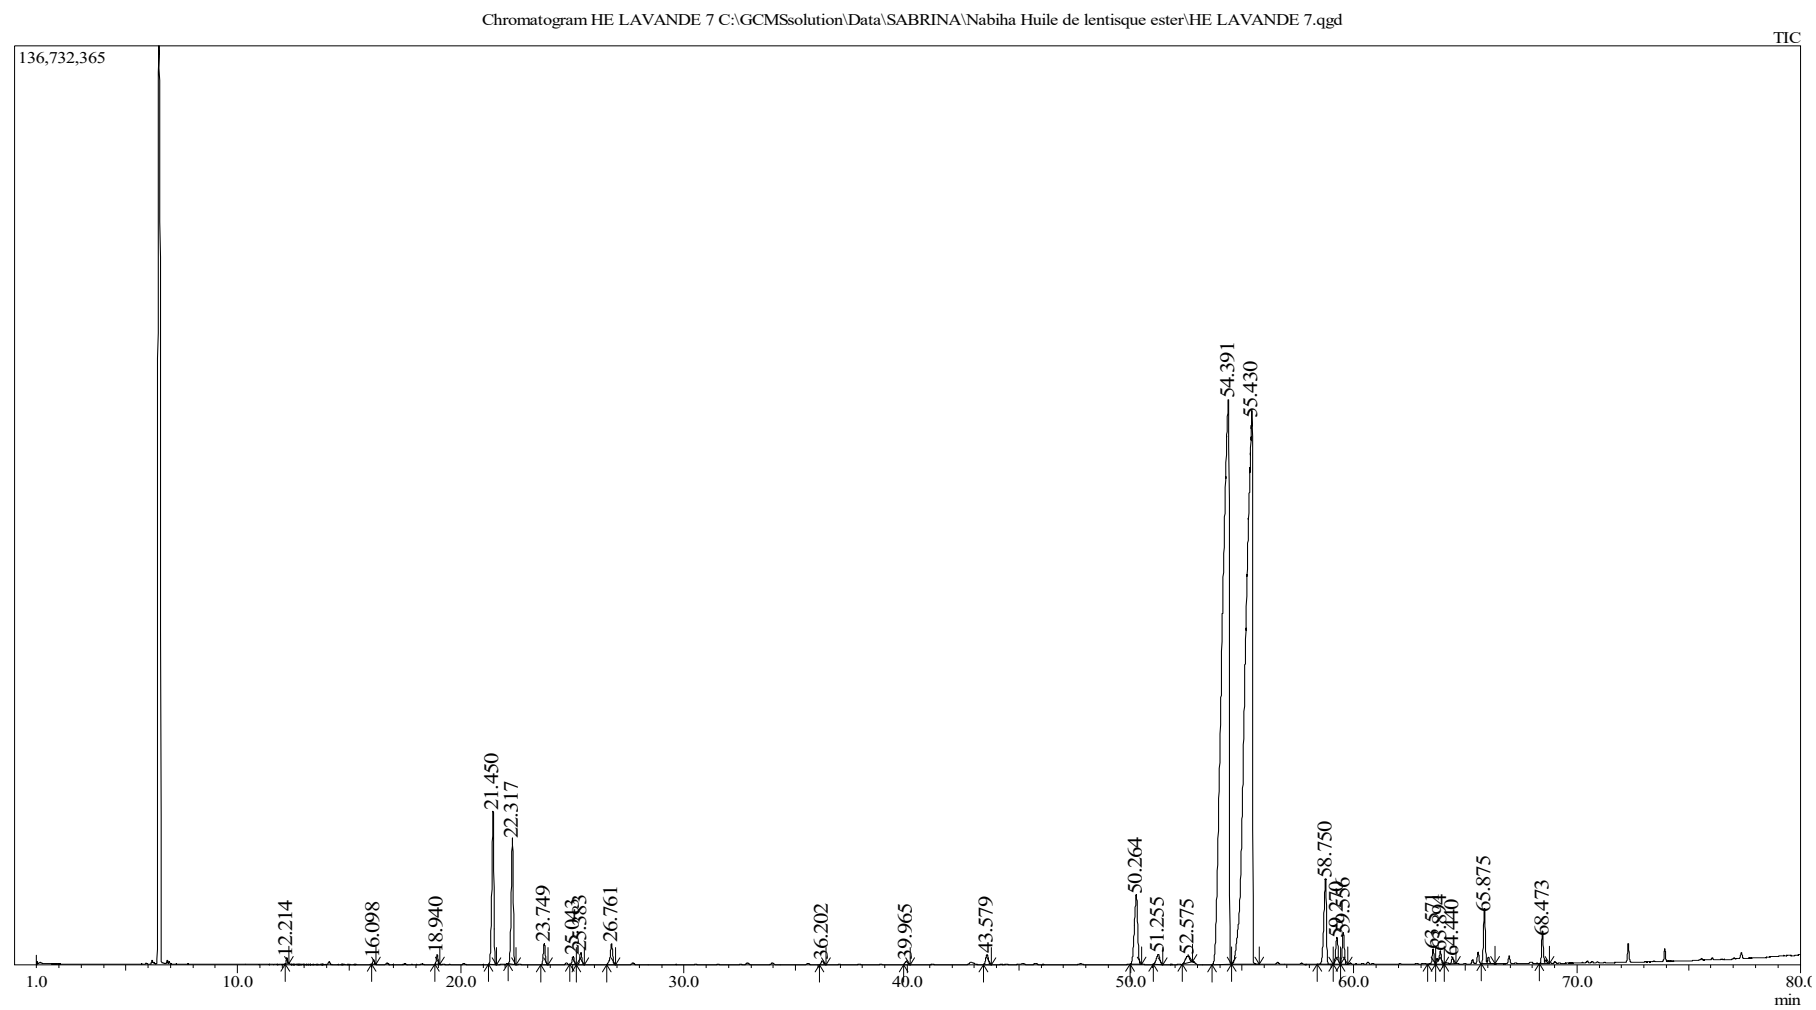

1.2.3. GC-FID Chromatograms – DB-Wax column

1.2.3.1. *Lavender 1*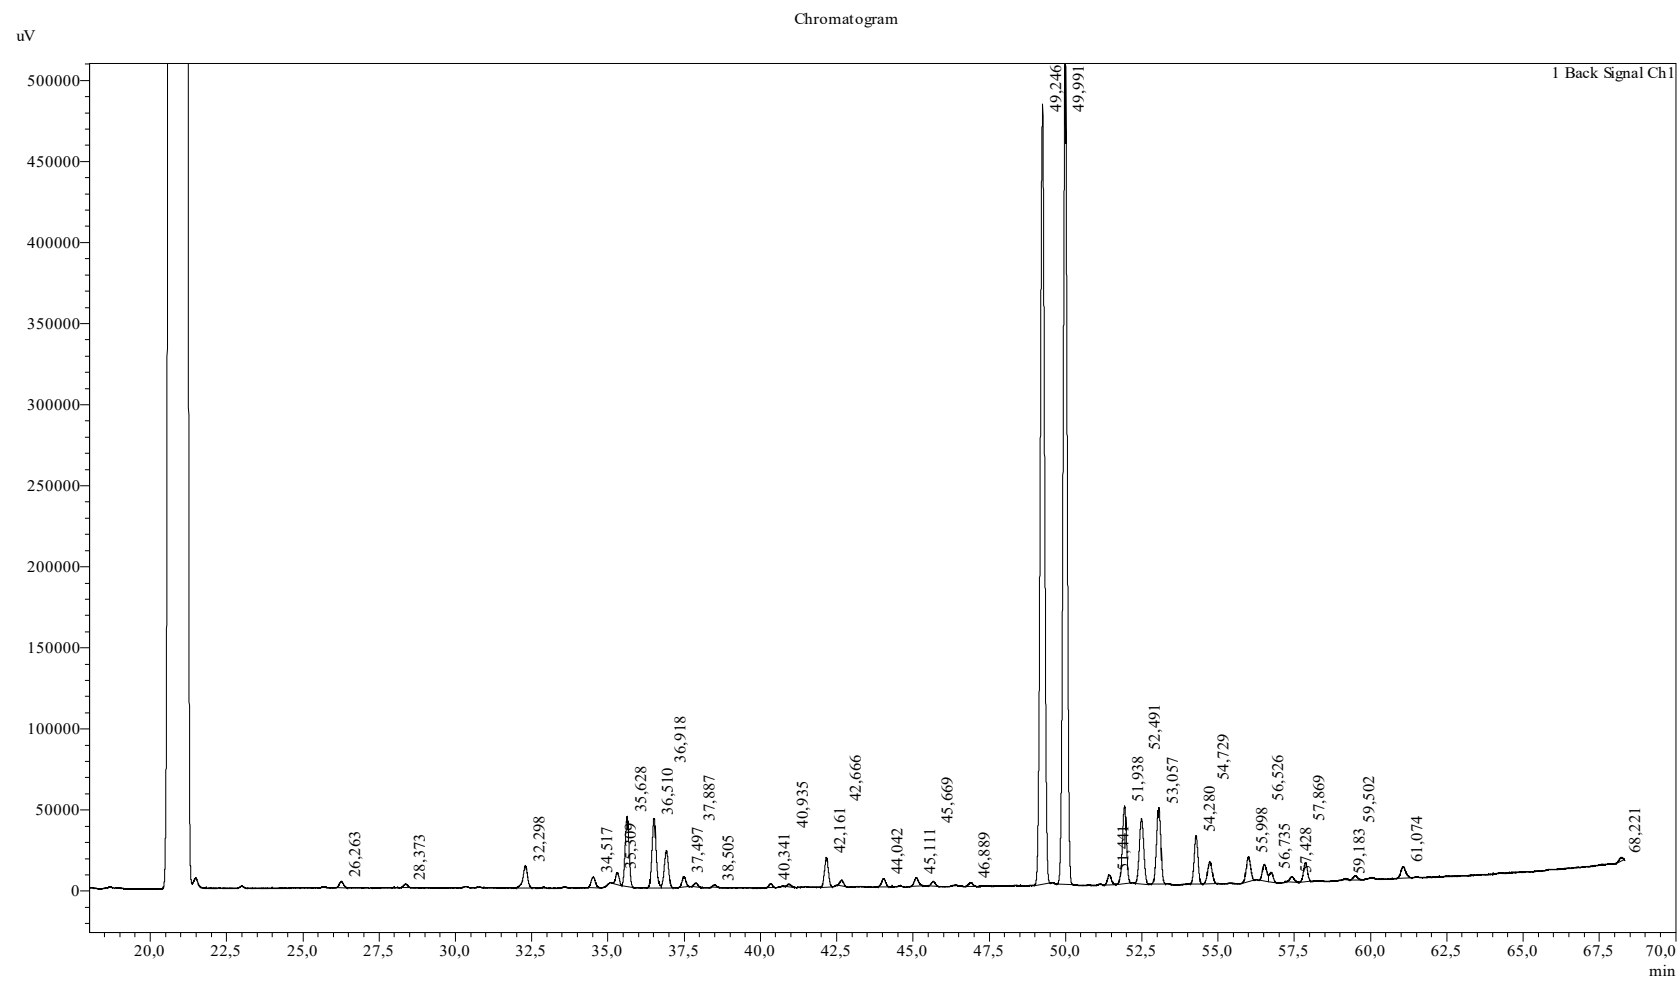1.2.3.2. *Lavender 2*

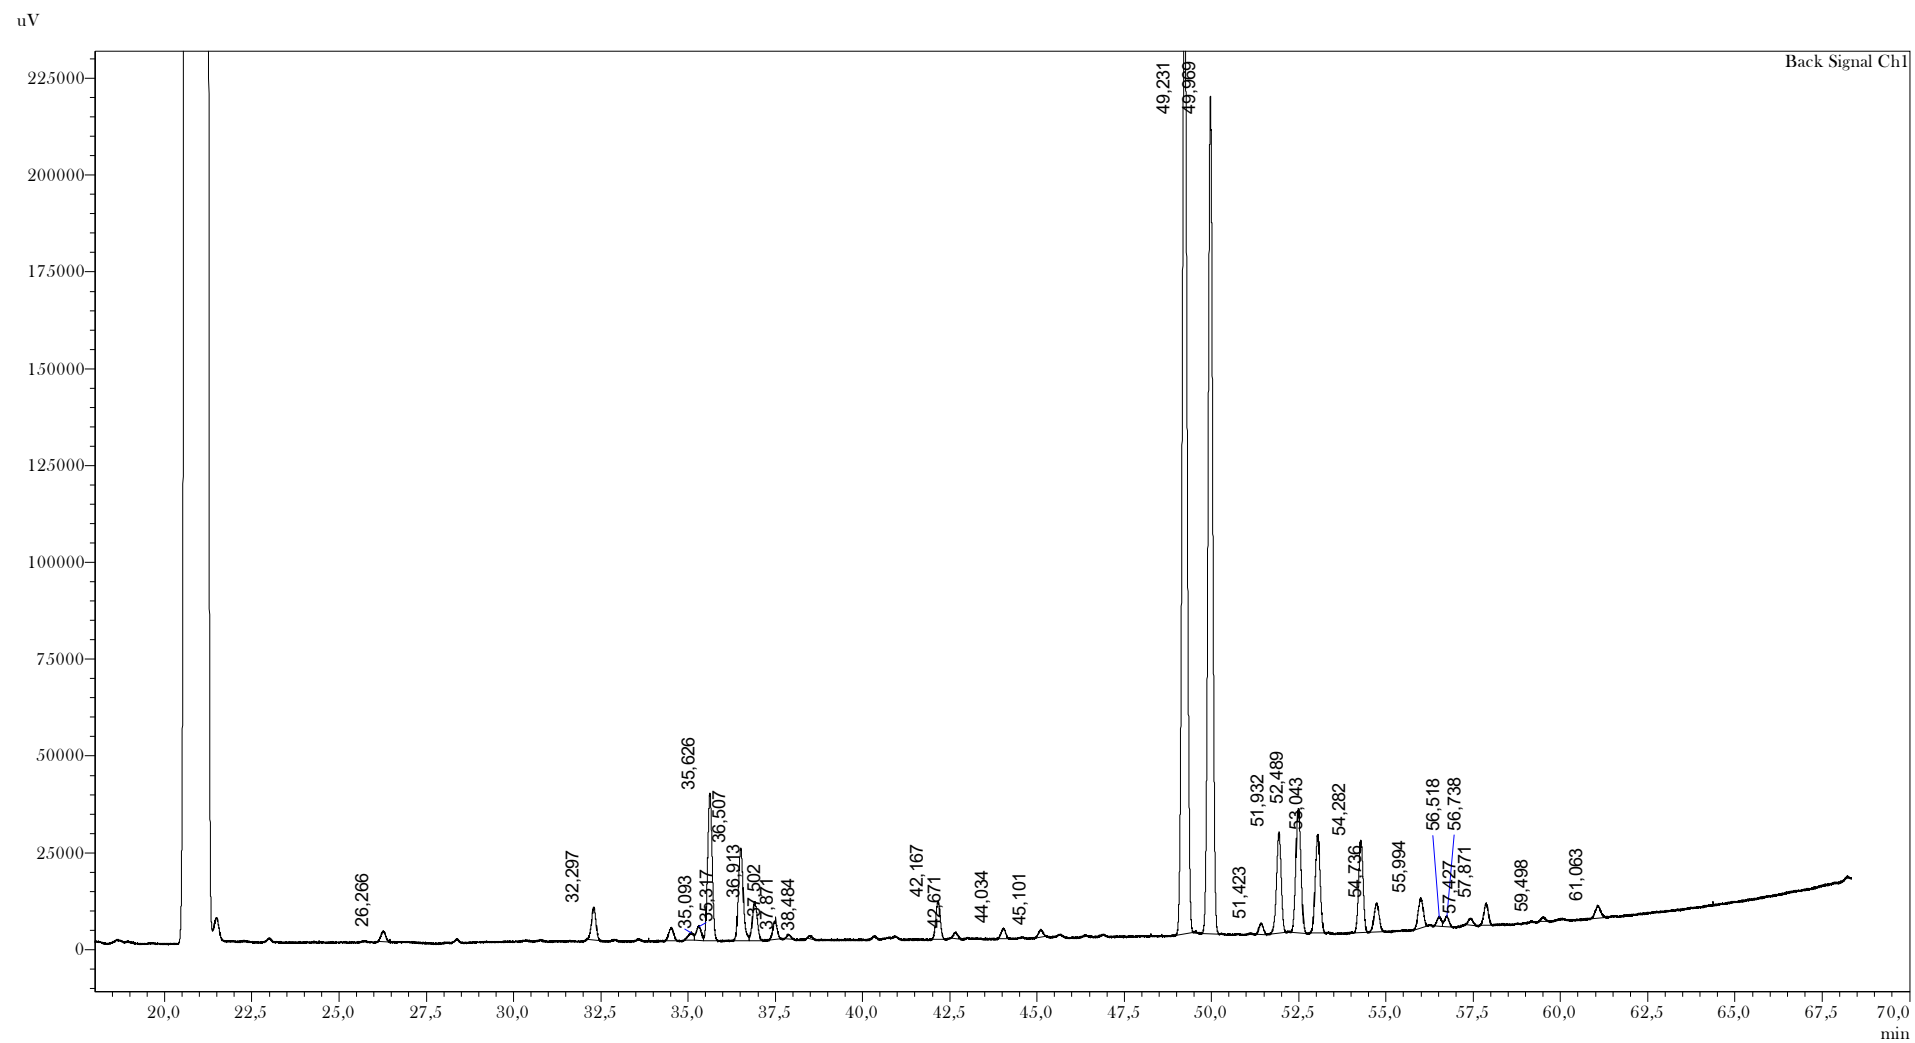

## 2. Additional tested lavender

Two pesticide-free lavender EOs were also included in the study. Lavender 3 comes from France (Drôme) as lavender 1 and lavender 4 comes from Bulgaria as lavender 2 (Table S1).

**Table S1.** Information on tested lavender EOs.

|            | Lavender 1   | Lavender 2 | Lavender 3   | Lavender 4 |
|------------|--------------|------------|--------------|------------|
| Origins    | France       | Bulgaria   | France       | Bulgaria   |
| Pesticides | Chlorpyrifos | ND         | Chlorpyrifos | ND         |

Lavender 3 and 4 have been analyzed in the same conditions than lavender EOs 1 and 2.

Lavender 3 had non cytotoxic effect at the tested concentrations (Figure S1), whereas lavender 4 triggered a 40% loss of cell viability (Figure S1).

Lavender 3 had no effect on progesterone, estradiol, h-hCG and hPL secretion (Figure S2-S5). Lavender 4 had no effect on progesterone, h-hCG and hPL release but induced a significant reduction of estradiol release ( $\times 0.53$  at  $0.17 \times 10^{-3}\%$ , Figure S3).

Two lavender EOs had no effect on P2X7 receptor activation (Figure S6).

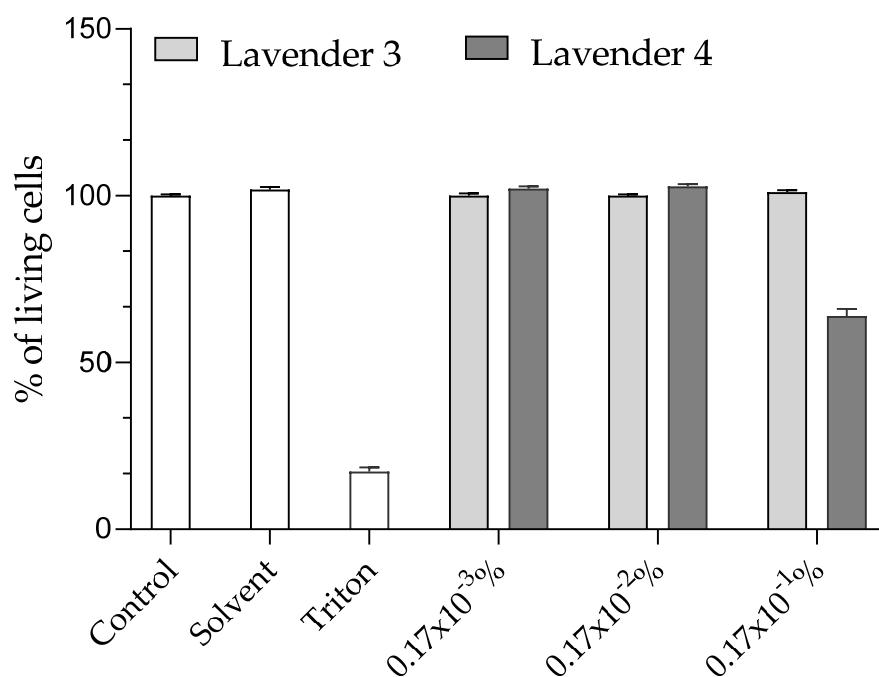

**Figure S1.** Cell viability was evaluated using the alamar blue assay after incubation of JEG-Tox cells with lavender EOs (3 and 4) at  $0.17 \times 10^{-3}\%$ ,  $0.17 \times 10^{-2}\%$  and  $0.17 \times 10^{-1}\%$  for 72 h. Triton® X-100 at 0.016%, is used as a positive control for cytotoxicity.



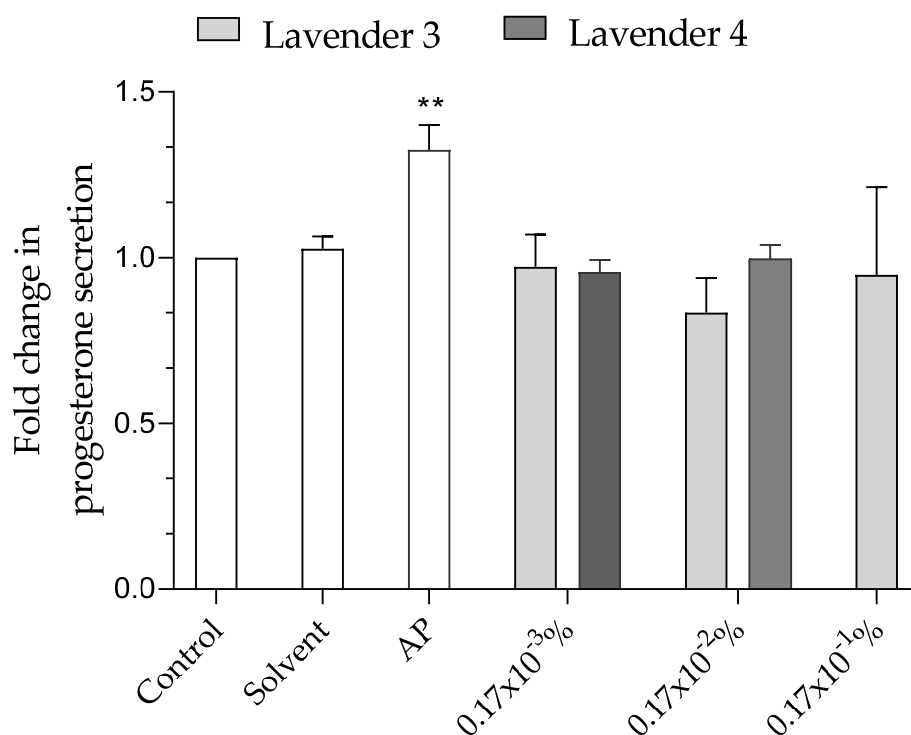

**Figure S2.** Quantification of progesterone release after incubation of JEG-Tox cells with lavender EOs (3 and 4) at 0.17x10<sup>-3</sup>%, 0.17x10<sup>-2</sup>% and 0.17x10<sup>-1</sup>% for 72 h. 4-tert-amylphenol (AP) at 10μM is used as a positive control for progesterone release.

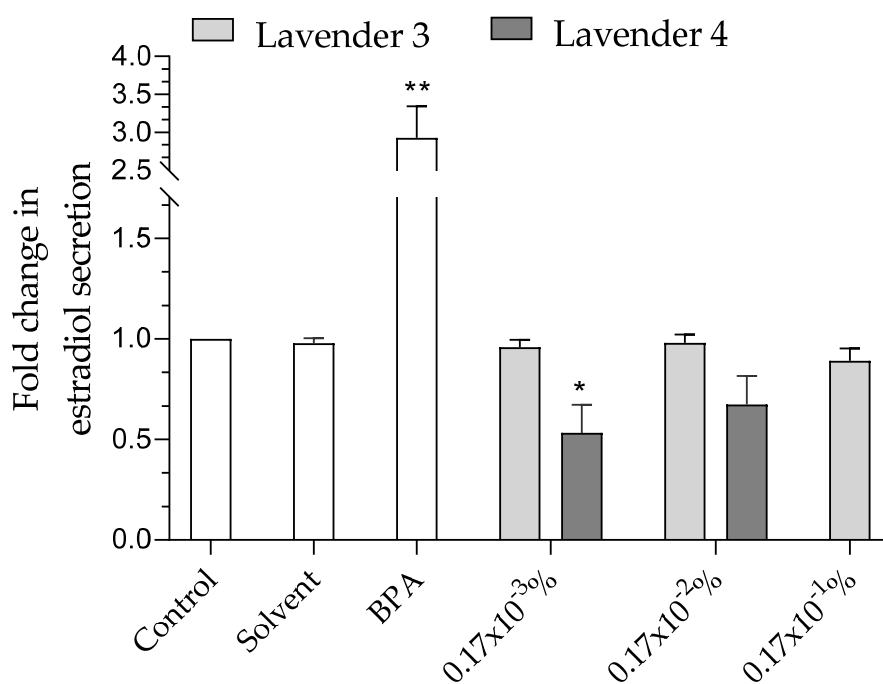

**Figure S3.** Quantification of estradiol release after incubation of JEG-Tox cells with lavender EOs (3 and 4) at 0.17x10<sup>-3</sup>%, 0.17x10<sup>-2</sup>% and 0.17x10<sup>-1</sup>% for 72 h. Bisphenol A (BPA) at 20μM is used as a positive control for estradiol release.

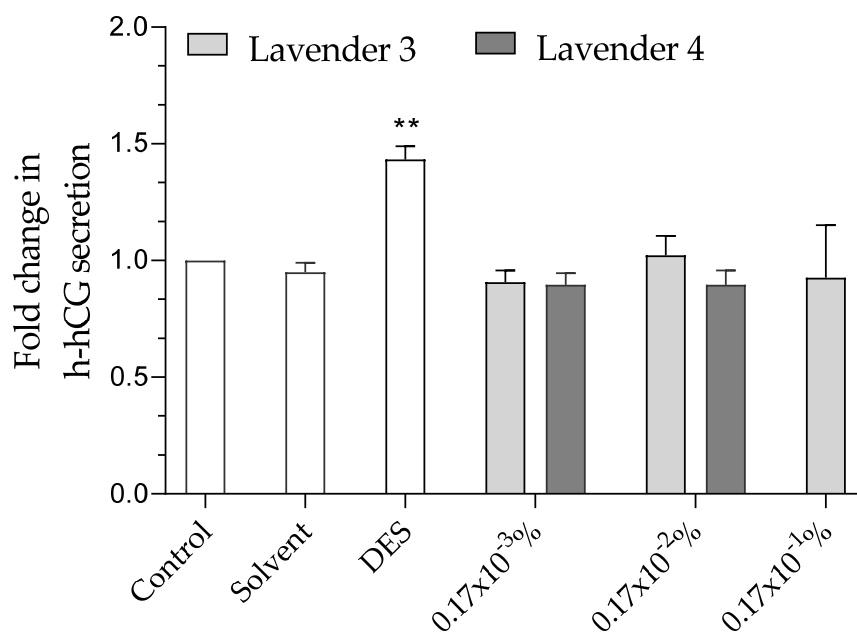

**Figure S4.** Quantification of h-hCG release after incubation of JEG-Tox cells with lavender EOs (3 and 4) at  $0.17 \times 10^{-3}\%$ ,  $0.17 \times 10^{-2}\%$  and  $0.17 \times 10^{-1}\%$  for 72 h. Diethylstilbestrol (DES) at  $3.75 \mu\text{M}$  is used as a positive control for h-hCG release.

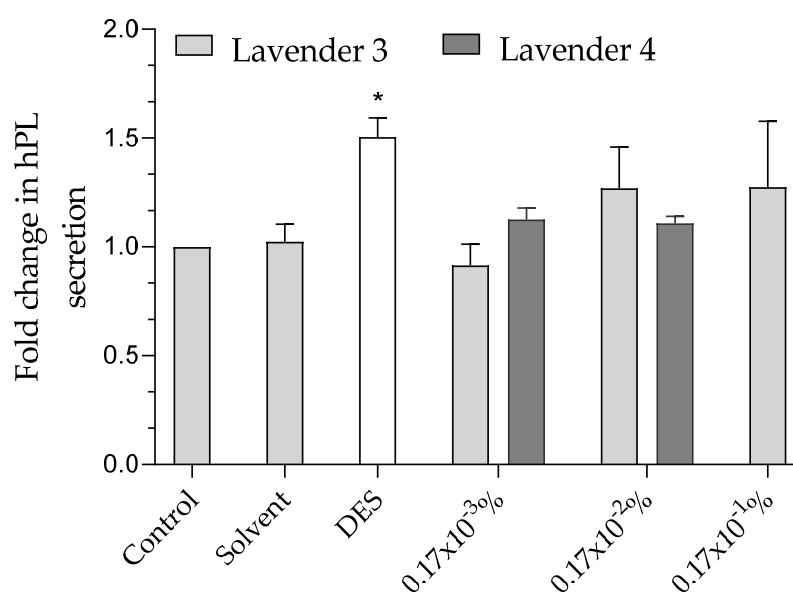

**Figure S5.** Quantification of hPL release after incubation of JEG-Tox cells with lavender EOs (3 and 4) at  $0.17 \times 10^{-3}\%$ ,  $0.17 \times 10^{-2}\%$  and  $0.17 \times 10^{-1}\%$  for 72 h. Diethylstilbestrol (DES) at  $3.75 \mu\text{M}$  is used as a positive control for hPL release.

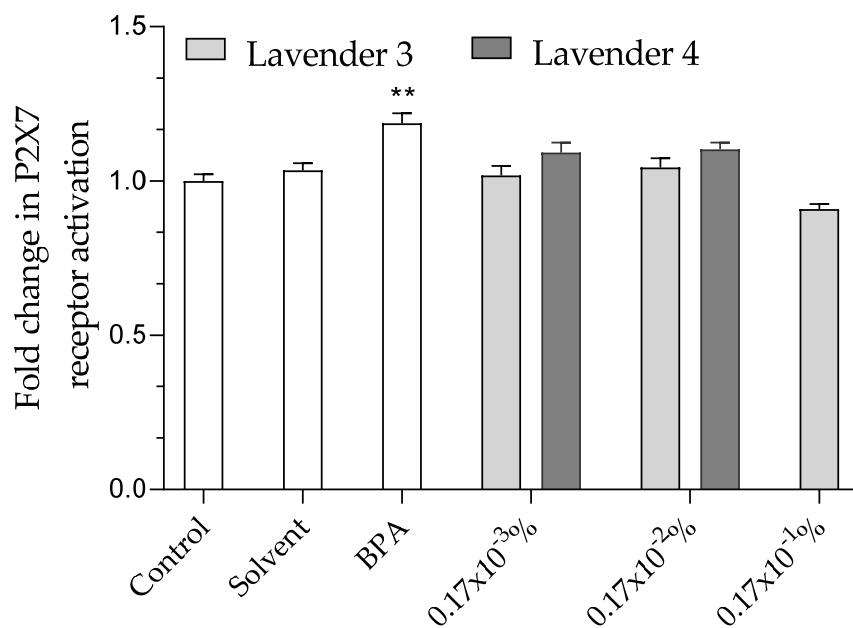

**Figure S6.** P2X7 receptor activation was evaluated using the YO-PRO-1 assay after incubation of JEG-Tox cells with lavender EO (3 and 4) at 0.17x10<sup>-3</sup>%, 0.17x10<sup>-2</sup>% and 0.17x10<sup>-1</sup>% for 72 h. Bisphenol A (BPA) at 20μM is used as a positive control for P2X7 receptor activation.
