# Supplementary material for: Cocktail Effect of Endocrine Disrupting Chemicals: Application to Chlorpyrifos in Lavender Essential Oils
Source: MDPI journal article supplement (doi:10.3390/ijerph191912984), 2022-10-10
Supplement: s1 [file s1]

**Pesticides**
**Multirésidus GC 250**

FB3/02.c vers. 24 (01/02/2019)

Résultat LQ méthode

Unité : mg/kg

|                                |       |      |         |                              |    |      |         |                                   |    |       |         |
|--------------------------------|-------|------|---------|------------------------------|----|------|---------|-----------------------------------|----|-------|---------|
| 1,4-Dimethylnaphtalène         | ND    | 0,01 | MOC3/05 | Coumaphos                    | ND | 0,01 | MOC3/05 | Fenobucarbe                       | ND | 0,01  | MOC3/05 |
| 2,4,6 trichlorophenol (TCP) (r | ND    | 0,01 | MOC3/05 | Cyfluthrine (β+γ)            | ND | 0,01 | MOC3/05 | Fenpropathrine                    | ND | 0,01  | MOC3/05 |
| 2-Phenylphenol(somme)          | ND    |      |         | Cyhalofop-butyl              | ND | 0,01 | MOC3/05 | Fenpropimorphe (Σ des isomères)   | ND | 0,01  | MOC3/05 |
| 2-Methoxybiphenyl              | ND    | 0,01 | MOC3/05 | Cyhalothrine(Σ des isomères) | ND | 0,01 | MOC3/05 | Fenvalerate (Σ des isomères)      | ND | 0,01  | MOC3/05 |
| 2-Phenylhydroquinone           | ND    | 0,01 | MOC3/05 | Cymiazole                    | ND | 0,01 | MOC3/05 | Fipronil(somme)                   | ND |       |         |
| 2-Phenylphenol                 | ND    | 0,01 | MOC3/05 | Cypermethrine(α+β+θ+ζ)       | ND | 0,01 | MOC3/05 | Fipronil                          | ND | 0,005 | MOC3/05 |
| 3,4-dichloroaniline            | ND    | 0,01 | MOC3/05 | Cyproconazole                | ND | 0,01 | MOC3/05 | Fipronil-sulfone                  | ND | 0,005 | MOC3/05 |
| 4,4-Dichlorobenzophenone       | ND    | 0,01 | MOC3/05 | Cyprodinil                   | ND | 0,01 | MOC3/05 | Fipronil-desulfinyl               | ND | 0,01  | MOC3/05 |
| Acetochlore                    | ND    | 0,01 | MOC3/05 | DDT(somme)                   | ND |      |         | Fluazifop-p-butyl (m)             | ND | 0,01  | MOC3/05 |
| Acibenzolar-S-methyl (m)       | ND    | 0,01 | MOC3/05 | o,p'-DDT                     | ND | 0,01 | MOC3/05 | Fluchloralin                      | ND | 0,01  | MOC3/05 |
| Acionifen                      | ND    | 0,01 | MOC3/05 | p,p'-DDT                     | ND | 0,01 | MOC3/05 | Flucythrinate                     | ND | 0,01  | MOC3/05 |
| Acrinathrine                   | ND    | 0,01 | MOC3/05 | p,p'-DDE                     | ND | 0,01 | MOC3/05 | Fludioxonil                       | ND | 0,01  | MOC3/05 |
| Alachlore                      | ND    | 0,01 | MOC3/05 | p,p'-TDE(DDD)                | ND | 0,01 | MOC3/05 | Flufenacet (m)                    | ND | 0,01  | MOC3/05 |
| Ametryn                        | ND    | 0,01 | MOC3/05 | Deltamethrine                | ND | 0,01 | MOC3/05 | Fluopicolide                      | ND | 0,01  | MOC3/05 |
| Amisulbrom                     | ND    | 0,01 | MOC3/05 | Demeton-S-methyl             | ND | 0,01 | MOC3/05 | Flurochloridone                   | ND | 0,01  | MOC3/05 |
| Atrazine                       | ND    | 0,01 | MOC3/05 | Dialifos                     | ND | 0,01 | MOC3/05 | Fluroxypyr-methylheptyl ester (m) | ND | 0,01  | MOC3/05 |
| Benalaxyl dont Benalaxyl-M     | ND    | 0,01 | MOC3/05 | Dichlobenil                  | ND | 0,01 | MOC3/05 | Flusilazole                       | ND | 0,01  | MOC3/05 |
| Bendiocarb                     | ND    | 0,01 | MOC3/05 | Dichlofenthion               | ND | 0,01 | MOC3/05 | Flutolanil                        | ND | 0,01  | MOC3/05 |
| Benfluraline                   | ND    | 0,01 | MOC3/05 | Dichlofluamide               | ND | 0,01 | MOC3/05 | Flutriafol                        | ND | 0,01  | MOC3/05 |
| Benoxacor                      | ND    | 0,01 | MOC3/05 | Dichlorvos                   | ND | 0,01 | MOC3/05 | Fluvalinate (Tau)                 | ND | 0,01  | MOC3/05 |
| Bifenox                        | ND    | 0,01 | MOC3/05 | Dicofop-methyl (m)           | ND | 0,01 | MOC3/05 | Folpet(somme)                     | ND |       |         |
| Bifenthrine (Σ des isomères)   | ND    | 0,01 | MOC3/05 | Dicofol(Σ des isomères)      | ND |      |         | Folpet                            | ND | 0,01  | MOC3/05 |
| Biphenyl                       | ND    | 0,01 | MOC3/05 | Dicofol o,p'                 | ND | 0,01 | MOC3/05 | Phtalimide                        | ND | 0,01  | MOC3/05 |
| Bitertanol (Σ des isomères)    | ND    | 0,01 | MOC3/05 | Dicofol p,p'                 | ND | 0,01 | MOC3/05 | Fonofos                           | ND | 0,01  | MOC3/05 |
| Bromocyclen                    | ND    | 0,01 | MOC3/05 | Dicrotophos                  | ND | 0,01 | MOC3/05 | Formothion                        | ND | 0,01  | MOC3/05 |
| Bromophos-ethyl                | ND    | 0,01 | MOC3/05 | Dieldrin(somme)              | ND |      |         | Furalaxyl                         | ND | 0,01  | MOC3/05 |
| Bromophos-methyl               | ND    | 0,01 | MOC3/05 | Aldrin                       | ND | 0,01 | MOC3/05 | Haloxypop-2-ethoxyethyl (m)       | ND | 0,01  | MOC3/05 |
| Bromopropylate                 | ND    | 0,01 | MOC3/05 | Dieldrin                     | ND | 0,01 | MOC3/05 | Haloxypop-methyl(R+S) (m)         | ND | 0,01  | MOC3/05 |
| Butachlor                      | ND    | 0,01 | MOC3/05 | Diethofencarb                | ND | 0,01 | MOC3/05 | HCB                               | ND | 0,01  | MOC3/05 |
| Butraline                      | ND    | 0,01 | MOC3/05 | Difenoconazole               | ND | 0,01 | MOC3/05 | HCH alpha                         | ND | 0,01  | MOC3/05 |
| Captafol                       | ND    | 0,01 | MOC3/05 | Diflufenican                 | ND | 0,01 | MOC3/05 | HCH beta                          | ND | 0,01  | MOC3/05 |
| Captan(somme)                  | ND    |      |         | Dimetachlor                  | ND | 0,01 | MOC3/05 | HCH gamma                         | ND | 0,01  | MOC3/05 |
| Captan                         | ND    | 0,01 | MOC3/05 | Dinitramine                  | ND | 0,01 | MOC3/05 | Heptachlore(somme)                | ND |       |         |
| Tetrahydroptalimide (THF       | ND    | 0,01 | MOC3/05 | Diphenylamine                | ND | 0,01 | MOC3/05 | Heptachlore                       | ND | 0,01  | MOC3/05 |
| Carbaryl                       | ND    | 0,01 | MOC3/05 | Disulfoton (m)               | ND | 0,01 | MOC3/05 | Heptachlore epoxyde cis-          | ND | 0,01  | MOC3/05 |
| Carbofuran(somme GC) (m)       | ND    |      |         | Ditalimfos                   | ND | 0,01 | MOC3/05 | Heptachlore epoxyde trans         | ND | 0,01  | MOC3/05 |
| Carbofuran                     | ND    | 0,01 | MOC3/05 | Edifenphos                   | ND | 0,01 | MOC3/05 | Heptenophos                       | ND | 0,01  | MOC3/05 |
| Carbofuran-3-Hydroxy           | ND    | 0,01 | MOC3/05 | Endosulfan(somme)            | ND |      |         | Hexazinone                        | ND | 0,01  | MOC3/05 |
| Furathiocarbe                  | ND    | 0,01 | MOC3/05 | Endosulfan α                 | ND | 0,01 | MOC3/05 | Iodofenphos                       | ND | 0,01  | MOC3/05 |
| Carbophenothion                | ND    | 0,01 | MOC3/05 | Endosulfan β                 | ND | 0,01 | MOC3/05 | Iprodione                         | ND | 0,01  | MOC3/05 |
| Carfentrazone-ethyl            | ND    | 0,01 | MOC3/05 | Endosulfan sulfate           | ND | 0,01 | MOC3/05 | Isobenzan                         | ND | 0,01  | MOC3/05 |
| Chlorbenside                   | ND    | 0,01 | MOC3/05 | Endrin                       | ND | 0,01 | MOC3/05 | Isodrine                          | ND | 0,01  | MOC3/05 |
| Chlordane(cis+trans)           | ND    | 0,01 | MOC3/05 | Endrin-ketone                | ND | 0,01 | MOC3/05 | Isofenphos-ethyl                  | ND | 0,01  | MOC3/05 |
| Chlorfenapyr                   | ND    | 0,01 | MOC3/05 | EPN                          | ND | 0,01 | MOC3/05 | Isofenphos-methyl                 | ND | 0,01  | MOC3/05 |
| Chlorfenson                    | ND    | 0,01 | MOC3/05 | Ethalfuraline                | ND | 0,01 | MOC3/05 | Isoxadifen-ethyl                  | ND | 0,01  | MOC3/05 |
| Chlorfenvinphos                | ND    | 0,01 | MOC3/05 | Ethiofencarb                 | ND | 0,01 | MOC3/05 | Leptophos                         | ND | 0,01  | MOC3/05 |
| Chlorobenzilate                | ND    | 0,01 | MOC3/05 | Ethion                       | ND | 0,01 | MOC3/05 | Malathion(somme)                  | ND |       |         |
| Chlorothalonil                 | ND    | 0,01 | MOC3/05 | Ethofumesate (m)             | ND | 0,01 | MOC3/05 | Malathion                         | ND | 0,01  | MOC3/05 |
| Chlorprophame                  | ND    | 0,01 | MOC3/05 | Ethoprophos                  | ND | 0,01 | MOC3/05 | Malaoxon                          | ND | 0,01  | MOC3/05 |
| Chlorpyrifos                   | 0,014 | 0,01 | MOC3/05 | Ethoxyquine                  | ND | 0,01 | MOC3/05 | Mepanipyrim                       | ND | 0,01  | MOC3/05 |
| Chlorpyrifos-methyl            | ND    | 0,01 | MOC3/05 | Etofenprox                   | ND | 0,01 | MOC3/05 | Mepronil                          | ND | 0,01  | MOC3/05 |
| Chlorthal dimethyl             | ND    | 0,01 | MOC3/05 | Etridiazole                  | ND | 0,01 | MOC3/05 | Metalaxyl dont Metalaxyl-M        | ND | 0,01  | MOC3/05 |
| Chlorthiophos                  | ND    | 0,01 | MOC3/05 | Etrimfos                     | ND | 0,01 | MOC3/05 | Metazachlor                       | ND | 0,01  | MOC3/05 |
| Chlozolinate                   | ND    | 0,01 | MOC3/05 | Famoxadone                   | ND | 0,01 | MOC3/05 | Methacrifos                       | ND | 0,01  | MOC3/05 |
| Clomazone                      | ND    | 0,01 | MOC3/05 | Famphur                      | ND | 0,01 | MOC3/05 | Methidathion                      | ND | 0,01  | MOC3/05 |
|                                |       |      |         | Fenamiphos (m)               | ND | 0,01 | MOC3/05 | Methoxychlore                     | ND | 0,01  | MOC3/05 |
|                                |       |      |         | Fenarimol                    | ND | 0,01 | MOC3/05 | Metolachlore dont S-              | ND | 0,01  | MOC3/05 |
|                                |       |      |         | Fenazaquin                   | ND | 0,01 | MOC3/05 | Metolachlore                      |    |       |         |
|                                |       |      |         | Fenchlorphos (m)             | ND | 0,01 | MOC3/05 | Mirex                             | ND | 0,01  | MOC3/05 |
|                                |       |      |         | Fenhexamide                  | ND | 0,01 | MOC3/05 | Myclobutanil                      | ND | 0,01  | MOC3/05 |
|                                |       |      |         | Fenitrothion                 | ND | 0,01 | MOC3/05 |                                   |    |       |         |

|                          |                 |                   |                 |
|--------------------------|-----------------|-------------------|-----------------|
| Nitrofen                 | ND 0,01 MOC3/05 | Tebufenpyrad      | ND 0,01 MOC3/05 |
| Nitrothal isopropyle     | ND 0,01 MOC3/05 | Tebupirimphos     | ND 0,01 MOC3/05 |
| Oxadiazon                | ND 0,01 MOC3/05 | Tecnazene         | ND 0,01 MOC3/05 |
| Oxadixyl                 | ND 0,01 MOC3/05 | Tefluthrine       | ND 0,01 MOC3/05 |
| Oxyfluorfen              | ND 0,01 MOC3/05 | Terbacil          | ND 0,01 MOC3/05 |
| Parathion-ethyl          | ND 0,01 MOC3/05 | Terbufos          | ND 0,01 MOC3/05 |
| Parathion-methyl (m)     | ND 0,01 MOC3/05 | Terbuthylazine    | ND 0,01 MOC3/05 |
| PCB 028                  | ND 0,01 MOC3/05 | Terbutryne        | ND 0,01 MOC3/05 |
| PCB 052                  | ND 0,01 MOC3/05 | Tetrachlorvinphos | ND 0,01 MOC3/05 |
| PCB 101                  | ND 0,01 MOC3/05 | Tetradifon        | ND 0,01 MOC3/05 |
| PCB 118                  | ND 0,01 MOC3/05 | Tetramethrine     | ND 0,01 MOC3/05 |
| PCB 138                  | ND 0,01 MOC3/05 | Tetrasul          | ND 0,01 MOC3/05 |
| PCB 153                  | ND 0,01 MOC3/05 | Tolclofos-methyl  | ND 0,01 MOC3/05 |
| PCB 180                  | ND 0,01 MOC3/05 | Tolyfluanid (m)   | ND 0,01 MOC3/05 |
| Penconazole              | ND 0,01 MOC3/05 | Tralomethrine     | ND 0,01 MOC3/05 |
| Pendimethaline           | ND 0,01 MOC3/05 | Transfluthrine    | ND 0,01 MOC3/05 |
| Pentachloroanisole       | ND 0,01 MOC3/05 | Triadimefon       | ND 0,01 MOC3/05 |
| Permethrine(cis + trans) | ND 0,01 MOC3/05 | Triadimenol       | ND 0,01 MOC3/05 |
| Perthane                 | ND 0,01 MOC3/05 | Triallate         | ND 0,01 MOC3/05 |
| Phenothrine              | ND 0,01 MOC3/05 | Triamiphos        | ND 0,01 MOC3/05 |
| Phenthoate               | ND 0,01 MOC3/05 | Triazophos        | ND 0,01 MOC3/05 |
| Phosalone                | ND 0,01 MOC3/05 | Trichloronat      | ND 0,01 MOC3/05 |
| Piperonyl butoxide       | ND 0,01 MOC3/05 | Trifluraline      | ND 0,01 MOC3/05 |
| Pirimicarb               | ND 0,01 MOC3/05 | Valifenalate      | ND 0,01 MOC3/05 |
| Pirimiphos-ethyl         | ND 0,01 MOC3/05 | Vinclozoline      | ND 0,01 MOC3/05 |
| Pirimiphos-methyl        | ND 0,01 MOC3/05 | Zoxamide          | ND 0,01 MOC3/05 |
| Plifenate                | ND 0,01 MOC3/05 |                   |                 |
| Pretilachlore            | ND 0,01 MOC3/05 |                   |                 |
| Procymidone              | ND 0,01 MOC3/05 |                   |                 |
| Profenophos              | ND 0,01 MOC3/05 |                   |                 |
| Prometryn                | ND 0,01 MOC3/05 |                   |                 |
| Propachlore (m)          | ND 0,01 MOC3/05 |                   |                 |
| Propazine                | ND 0,01 MOC3/05 |                   |                 |
| Propetamphos             | ND 0,01 MOC3/05 |                   |                 |
| Prophame                 | ND 0,01 MOC3/05 |                   |                 |
| Propiconazole            | ND 0,01 MOC3/05 |                   |                 |
| Propyzamide              | ND 0,01 MOC3/05 |                   |                 |
| Proquinazid              | ND 0,01 MOC3/05 |                   |                 |
| Prosulfocarbe            | ND 0,01 MOC3/05 |                   |                 |
| Prothiophos              | ND 0,01 MOC3/05 |                   |                 |
| Prothoate                | ND 0,01 MOC3/05 |                   |                 |
| Pyrazophos               | ND 0,01 MOC3/05 |                   |                 |
| Pyridaben                | ND 0,01 MOC3/05 |                   |                 |
| Pyridalyl                | ND 0,01 MOC3/05 |                   |                 |
| Pyridaphenthion          | ND 0,01 MOC3/05 |                   |                 |
| Pyrifenox                | ND 0,01 MOC3/05 |                   |                 |
| Pyrimethanil             | ND 0,01 MOC3/05 |                   |                 |
| Pyriproxyfen             | ND 0,01 MOC3/05 |                   |                 |
| Quinalphos               | ND 0,01 MOC3/05 |                   |                 |
| Quinomethionate          | ND 0,01 MOC3/05 |                   |                 |
| Quinoxifen               | ND 0,01 MOC3/05 |                   |                 |
| Quintozene(somme)        | ND              |                   |                 |
| Quintozene               | ND 0,01 MOC3/05 |                   |                 |
| Pentachloroaniline (PCA) | ND 0,01 MOC3/05 |                   |                 |
| Quizalofop-ethyl         | ND 0,01 MOC3/05 |                   |                 |
| S 421                    | ND 0,01 MOC3/05 |                   |                 |
| Sebuthylazine            | ND 0,01 MOC3/05 |                   |                 |
| Secbumeton               | ND 0,01 MOC3/05 |                   |                 |
| Sulfotep                 | ND 0,01 MOC3/05 |                   |                 |
| Sulprofos                | ND 0,01 MOC3/05 |                   |                 |
| Tebuconazole             | ND 0,01 MOC3/05 |                   |                 |



**Pesticides**
**Multirésidus GC 250**

FB3/02.c vers. 24 (01/02/2019)

Résultat LQ méthode

Unité : mg/kg

|                                |       |      |         |                              |    |      |         |                                   |    |       |         |
|--------------------------------|-------|------|---------|------------------------------|----|------|---------|-----------------------------------|----|-------|---------|
| 1,4-Dimethylnaphtalène         | ND    | 0,01 | MOC3/05 | Coumaphos                    | ND | 0,01 | MOC3/05 | Fenobucarbe                       | ND | 0,01  | MOC3/05 |
| 2,4,6 trichlorophenol (TCP) (r | ND    | 0,01 | MOC3/05 | Cyfluthrine (β+γ)            | ND | 0,01 | MOC3/05 | Fenpropathrine                    | ND | 0,01  | MOC3/05 |
| 2-Phenylphenol(somme)          | ND    |      |         | Cyhalofop-butyl              | ND | 0,01 | MOC3/05 | Fenpropimorphe (Σ des isomères)   | ND | 0,01  | MOC3/05 |
| 2-Methoxybiphenyl              | ND    | 0,01 | MOC3/05 | Cyhalothrine(Σ des isomères) | ND | 0,01 | MOC3/05 | Fenvalerate (Σ des isomères)      | ND | 0,01  | MOC3/05 |
| 2-Phenylhydroquinone           | ND    | 0,01 | MOC3/05 | Cymiazole                    | ND | 0,01 | MOC3/05 | Fipronil(somme)                   | ND |       |         |
| 2-Phenylphenol                 | ND    | 0,01 | MOC3/05 | Cypermethrine(α+β+θ+ζ)       | ND | 0,01 | MOC3/05 | Fipronil                          | ND | 0,005 | MOC3/05 |
| 3,4-dichloroaniline            | ND    | 0,01 | MOC3/05 | Cyproconazole                | ND | 0,01 | MOC3/05 | Fipronil-sulfone                  | ND | 0,005 | MOC3/05 |
| 4,4-Dichlorobenzophenone       | ND    | 0,01 | MOC3/05 | Cyprodinil                   | ND | 0,01 | MOC3/05 | Fipronil-desulfinyl               | ND | 0,01  | MOC3/05 |
| Acetochlore                    | ND    | 0,01 | MOC3/05 | DDT(somme)                   | ND |      |         | Fluazifop-p-butyl (m)             | ND | 0,01  | MOC3/05 |
| Acibenzolar-S-methyl (m)       | ND    | 0,01 | MOC3/05 | o,p'-DDT                     | ND | 0,01 | MOC3/05 | Fluchloralin                      | ND | 0,01  | MOC3/05 |
| Acionifen                      | ND    | 0,01 | MOC3/05 | p,p'-DDT                     | ND | 0,01 | MOC3/05 | Flucythrinate                     | ND | 0,01  | MOC3/05 |
| Acrinathrine                   | ND    | 0,01 | MOC3/05 | p,p'-DDE                     | ND | 0,01 | MOC3/05 | Fludioxonil                       | ND | 0,01  | MOC3/05 |
| Alachlore                      | ND    | 0,01 | MOC3/05 | p,p'-TDE(DDD)                | ND | 0,01 | MOC3/05 | Flufenacet (m)                    | ND | 0,01  | MOC3/05 |
| Ametryn                        | ND    | 0,01 | MOC3/05 | Deltamethrine                | ND | 0,01 | MOC3/05 | Fluopicolide                      | ND | 0,01  | MOC3/05 |
| Amisulbrom                     | ND    | 0,01 | MOC3/05 | Demeton-S-methyl             | ND | 0,01 | MOC3/05 | Flurochloridone                   | ND | 0,01  | MOC3/05 |
| Atrazine                       | ND    | 0,01 | MOC3/05 | Dialifos                     | ND | 0,01 | MOC3/05 | Fluroxypyr-methylheptyl ester (m) | ND | 0,01  | MOC3/05 |
| Benalaxyl dont Benalaxyl-M     | ND    | 0,01 | MOC3/05 | Dichlobenil                  | ND | 0,01 | MOC3/05 | Flusilazole                       | ND | 0,01  | MOC3/05 |
| Bendiocarb                     | ND    | 0,01 | MOC3/05 | Dichlofenthion               | ND | 0,01 | MOC3/05 | Flutolanil                        | ND | 0,01  | MOC3/05 |
| Benfluraline                   | ND    | 0,01 | MOC3/05 | Dichlofluamide               | ND | 0,01 | MOC3/05 | Flutriafol                        | ND | 0,01  | MOC3/05 |
| Benoxacor                      | ND    | 0,01 | MOC3/05 | Dichlorvos                   | ND | 0,01 | MOC3/05 | Fluvalinate (Tau)                 | ND | 0,01  | MOC3/05 |
| Bifenox                        | ND    | 0,01 | MOC3/05 | Dicofop-methyl (m)           | ND | 0,01 | MOC3/05 | Folpet(somme)                     | ND |       |         |
| Bifenthrine (Σ des isomères)   | ND    | 0,01 | MOC3/05 | Dicofol(Σ des isomères)      | ND |      |         | Folpet                            | ND | 0,01  | MOC3/05 |
| Biphenyl                       | ND    | 0,01 | MOC3/05 | Dicofol o,p'                 | ND | 0,01 | MOC3/05 | Phtalimide                        | ND | 0,01  | MOC3/05 |
| Bitertanol (Σ des isomères)    | ND    | 0,01 | MOC3/05 | Dicofol p,p'                 | ND | 0,01 | MOC3/05 | Fonofos                           | ND | 0,01  | MOC3/05 |
| Bromocyclen                    | ND    | 0,01 | MOC3/05 | Dicrotophos                  | ND | 0,01 | MOC3/05 | Formothion                        | ND | 0,01  | MOC3/05 |
| Bromophos-ethyl                | ND    | 0,01 | MOC3/05 | Dieldrin(somme)              | ND |      |         | Furalaxyl                         | ND | 0,01  | MOC3/05 |
| Bromophos-methyl               | ND    | 0,01 | MOC3/05 | Aldrin                       | ND | 0,01 | MOC3/05 | Haloxyfop-2-ethoxyethyl (m)       | ND | 0,01  | MOC3/05 |
| Bromopropylate                 | ND    | 0,01 | MOC3/05 | Dieldrin                     | ND | 0,01 | MOC3/05 | Haloxyfop-methyl(R+S) (m)         | ND | 0,01  | MOC3/05 |
| Butachlor                      | ND    | 0,01 | MOC3/05 | Diethofencarb                | ND | 0,01 | MOC3/05 | HCB                               | ND | 0,01  | MOC3/05 |
| Butraline                      | ND    | 0,01 | MOC3/05 | Difenoconazole               | ND | 0,01 | MOC3/05 | HCH alpha                         | ND | 0,01  | MOC3/05 |
| Captafol                       | ND    | 0,01 | MOC3/05 | Diflufenican                 | ND | 0,01 | MOC3/05 | HCH beta                          | ND | 0,01  | MOC3/05 |
| Captan(somme)                  | ND    |      |         | Dimetachlor                  | ND | 0,01 | MOC3/05 | HCH gamma                         | ND | 0,01  | MOC3/05 |
| Captan                         | ND    | 0,01 | MOC3/05 | Dinitramine                  | ND | 0,01 | MOC3/05 | Heptachlore(somme)                | ND |       |         |
| Tetrahydroptalimide (THF       | ND    | 0,01 | MOC3/05 | Diphenylamine                | ND | 0,01 | MOC3/05 | Heptachlore                       | ND | 0,01  | MOC3/05 |
| Carbaryl                       | ND    | 0,01 | MOC3/05 | Disulfoton (m)               | ND | 0,01 | MOC3/05 | Heptachlore epoxyde cis-          | ND | 0,01  | MOC3/05 |
| Carbofuran(somme GC) (m)       | ND    |      |         | Ditalimfos                   | ND | 0,01 | MOC3/05 | Heptachlore epoxyde trans         | ND | 0,01  | MOC3/05 |
| Carbofuran                     | ND    | 0,01 | MOC3/05 | Edifenphos                   | ND | 0,01 | MOC3/05 | Heptenophos                       | ND | 0,01  | MOC3/05 |
| Carbofuran-3-Hydroxy           | ND    | 0,01 | MOC3/05 | Endosulfan(somme)            | ND |      |         | Hexazinone                        | ND | 0,01  | MOC3/05 |
| Furathiocarbe                  | ND    | 0,01 | MOC3/05 | Endosulfan α                 | ND | 0,01 | MOC3/05 | Iodofenphos                       | ND | 0,01  | MOC3/05 |
| Carbophenothion                | ND    | 0,01 | MOC3/05 | Endosulfan β                 | ND | 0,01 | MOC3/05 | Iprodione                         | ND | 0,01  | MOC3/05 |
| Carfentrazone-ethyl            | ND    | 0,01 | MOC3/05 | Endosulfan sulfate           | ND | 0,01 | MOC3/05 | Isobenzan                         | ND | 0,01  | MOC3/05 |
| Chlorbenside                   | ND    | 0,01 | MOC3/05 | Endrin                       | ND | 0,01 | MOC3/05 | Isodrine                          | ND | 0,01  | MOC3/05 |
| Chlordane(cis+trans)           | ND    | 0,01 | MOC3/05 | Endrin-ketone                | ND | 0,01 | MOC3/05 | Isofenphos-ethyl                  | ND | 0,01  | MOC3/05 |
| Chlorfenapyr                   | ND    | 0,01 | MOC3/05 | EPN                          | ND | 0,01 | MOC3/05 | Isofenphos-methyl                 | ND | 0,01  | MOC3/05 |
| Chlorfenson                    | ND    | 0,01 | MOC3/05 | Ethalfuraline                | ND | 0,01 | MOC3/05 | Isoxadifen-ethyl                  | ND | 0,01  | MOC3/05 |
| Chlorfenvinphos                | ND    | 0,01 | MOC3/05 | Ethiofencarb                 | ND | 0,01 | MOC3/05 | Leptophos                         | ND | 0,01  | MOC3/05 |
| Chlorobenzilate                | ND    | 0,01 | MOC3/05 | Ethion                       | ND | 0,01 | MOC3/05 | Malathion(somme)                  | ND |       |         |
| Chlorothalonil                 | ND    | 0,01 | MOC3/05 | Ethofumesate (m)             | ND | 0,01 | MOC3/05 | Malathion                         | ND | 0,01  | MOC3/05 |
| Chlorprophame                  | ND    | 0,01 | MOC3/05 | Ethoprophos                  | ND | 0,01 | MOC3/05 | Malaoxon                          | ND | 0,01  | MOC3/05 |
| Chlorpyrifos                   | 0,014 | 0,01 | MOC3/05 | Ethoxyquine                  | ND | 0,01 | MOC3/05 | Mepanipyrim                       | ND | 0,01  | MOC3/05 |
| Chlorpyrifos-methyl            | ND    | 0,01 | MOC3/05 | Etofenprox                   | ND | 0,01 | MOC3/05 | Mepronil                          | ND | 0,01  | MOC3/05 |
| Chlorthal dimethyl             | ND    | 0,01 | MOC3/05 | Etridiazole                  | ND | 0,01 | MOC3/05 | Metalaxyl dont Metalaxyl-M        | ND | 0,01  | MOC3/05 |
| Chlorthiophos                  | ND    | 0,01 | MOC3/05 | Etrimfos                     | ND | 0,01 | MOC3/05 | Metazachlor                       | ND | 0,01  | MOC3/05 |
| Chlozolinate                   | ND    | 0,01 | MOC3/05 | Famoxadone                   | ND | 0,01 | MOC3/05 | Methacrifos                       | ND | 0,01  | MOC3/05 |
| Clomazone                      | ND    | 0,01 | MOC3/05 | Famphur                      | ND | 0,01 | MOC3/05 | Methidathion                      | ND | 0,01  | MOC3/05 |
|                                |       |      |         | Fenamiphos (m)               | ND | 0,01 | MOC3/05 | Methoxychlore                     | ND | 0,01  | MOC3/05 |
|                                |       |      |         | Fenarimol                    | ND | 0,01 | MOC3/05 | Metolachlore dont S-              | ND | 0,01  | MOC3/05 |
|                                |       |      |         | Fenazaquin                   | ND | 0,01 | MOC3/05 | Metolachlore                      |    |       |         |
|                                |       |      |         | Fenchlorphos (m)             | ND | 0,01 | MOC3/05 | Mirex                             | ND | 0,01  | MOC3/05 |
|                                |       |      |         | Fenhexamide                  | ND | 0,01 | MOC3/05 | Myclobutanil                      | ND | 0,01  | MOC3/05 |
|                                |       |      |         | Fenitrothion                 | ND | 0,01 | MOC3/05 |                                   |    |       |         |

|                          |                 |                   |                 |
|--------------------------|-----------------|-------------------|-----------------|
| Nitrofen                 | ND 0,01 MOC3/05 | Tebufenpyrad      | ND 0,01 MOC3/05 |
| Nitrothal isopropyle     | ND 0,01 MOC3/05 | Tebupirimphos     | ND 0,01 MOC3/05 |
| Oxadiazon                | ND 0,01 MOC3/05 | Tecnazene         | ND 0,01 MOC3/05 |
| Oxadixyl                 | ND 0,01 MOC3/05 | Tefluthrine       | ND 0,01 MOC3/05 |
| Oxyfluorfen              | ND 0,01 MOC3/05 | Terbacil          | ND 0,01 MOC3/05 |
| Parathion-ethyl          | ND 0,01 MOC3/05 | Terbufos          | ND 0,01 MOC3/05 |
| Parathion-methyl (m)     | ND 0,01 MOC3/05 | Terbuthylazine    | ND 0,01 MOC3/05 |
| PCB 028                  | ND 0,01 MOC3/05 | Terbutryne        | ND 0,01 MOC3/05 |
| PCB 052                  | ND 0,01 MOC3/05 | Tetrachlorvinphos | ND 0,01 MOC3/05 |
| PCB 101                  | ND 0,01 MOC3/05 | Tetradifon        | ND 0,01 MOC3/05 |
| PCB 118                  | ND 0,01 MOC3/05 | Tetramethrine     | ND 0,01 MOC3/05 |
| PCB 138                  | ND 0,01 MOC3/05 | Tetrasul          | ND 0,01 MOC3/05 |
| PCB 153                  | ND 0,01 MOC3/05 | Tolclofos-methyl  | ND 0,01 MOC3/05 |
| PCB 180                  | ND 0,01 MOC3/05 | Tolyfluanid (m)   | ND 0,01 MOC3/05 |
| Penconazole              | ND 0,01 MOC3/05 | Tralomethrine     | ND 0,01 MOC3/05 |
| Pendimethaline           | ND 0,01 MOC3/05 | Transfluthrine    | ND 0,01 MOC3/05 |
| Pentachloroanisole       | ND 0,01 MOC3/05 | Triadimefon       | ND 0,01 MOC3/05 |
| Permethrine(cis + trans) | ND 0,01 MOC3/05 | Triadimenol       | ND 0,01 MOC3/05 |
| Perthane                 | ND 0,01 MOC3/05 | Triallate         | ND 0,01 MOC3/05 |
| Phenothrine              | ND 0,01 MOC3/05 | Triamiphos        | ND 0,01 MOC3/05 |
| Phenthoate               | ND 0,01 MOC3/05 | Triazophos        | ND 0,01 MOC3/05 |
| Phosalone                | ND 0,01 MOC3/05 | Trichloronat      | ND 0,01 MOC3/05 |
| Piperonyl butoxide       | ND 0,01 MOC3/05 | Trifluraline      | ND 0,01 MOC3/05 |
| Pirimicarb               | ND 0,01 MOC3/05 | Valifenalate      | ND 0,01 MOC3/05 |
| Pirimiphos-ethyl         | ND 0,01 MOC3/05 | Vinclozoline      | ND 0,01 MOC3/05 |
| Pirimiphos-methyl        | ND 0,01 MOC3/05 | Zoxamide          | ND 0,01 MOC3/05 |
| Plifenate                | ND 0,01 MOC3/05 |                   |                 |
| Pretilachlore            | ND 0,01 MOC3/05 |                   |                 |
| Procymidone              | ND 0,01 MOC3/05 |                   |                 |
| Profenophos              | ND 0,01 MOC3/05 |                   |                 |
| Prometryn                | ND 0,01 MOC3/05 |                   |                 |
| Propachlore (m)          | ND 0,01 MOC3/05 |                   |                 |
| Propazine                | ND 0,01 MOC3/05 |                   |                 |
| Propetamphos             | ND 0,01 MOC3/05 |                   |                 |
| Prophame                 | ND 0,01 MOC3/05 |                   |                 |
| Propiconazole            | ND 0,01 MOC3/05 |                   |                 |
| Propyzamide              | ND 0,01 MOC3/05 |                   |                 |
| Proquinazid              | ND 0,01 MOC3/05 |                   |                 |
| Prosulfocarbe            | ND 0,01 MOC3/05 |                   |                 |
| Prothiophos              | ND 0,01 MOC3/05 |                   |                 |
| Prothoate                | ND 0,01 MOC3/05 |                   |                 |
| Pyrazophos               | ND 0,01 MOC3/05 |                   |                 |
| Pyridaben                | ND 0,01 MOC3/05 |                   |                 |
| Pyridalyl                | ND 0,01 MOC3/05 |                   |                 |
| Pyridaphenthion          | ND 0,01 MOC3/05 |                   |                 |
| Pyrifenox                | ND 0,01 MOC3/05 |                   |                 |
| Pyrimethanil             | ND 0,01 MOC3/05 |                   |                 |
| Pyriproxyfen             | ND 0,01 MOC3/05 |                   |                 |
| Quinalphos               | ND 0,01 MOC3/05 |                   |                 |
| Quinomethionate          | ND 0,01 MOC3/05 |                   |                 |
| Quinoxifen               | ND 0,01 MOC3/05 |                   |                 |
| Quintozene(somme)        | ND              |                   |                 |
| Quintozene               | ND 0,01 MOC3/05 |                   |                 |
| Pentachloroaniline (PCA) | ND 0,01 MOC3/05 |                   |                 |
| Quizalofop-ethyl         | ND 0,01 MOC3/05 |                   |                 |
| S 421                    | ND 0,01 MOC3/05 |                   |                 |
| Sebuthylazine            | ND 0,01 MOC3/05 |                   |                 |
| Secbumeton               | ND 0,01 MOC3/05 |                   |                 |
| Sulfotep                 | ND 0,01 MOC3/05 |                   |                 |
| Sulprofos                | ND 0,01 MOC3/05 |                   |                 |
| Tebuconazole             | ND 0,01 MOC3/05 |                   |                 |
